# Supplementary material for: Polyelectrolyte-Coated Gold Nanoparticles: The Effect of Salt and Polyelectrolyte Concentration on Colloidal Stability
Source: MDPI journal article supplement (doi:10.3390/polym10121336), 2018-12-03
Supplement: s1 [file s1]

## Supporting Information

Table S1: Difference in SPR peak and absorbance for citrate capped AuNP and PDADMAC coated AuNP in Ethanol, Tween20 and PBS.

|                     | $\Delta$ SPR Peak between NPs in MilliQ and NPs in varying solvents (nm) |                    |     |
|---------------------|--------------------------------------------------------------------------|--------------------|-----|
| Samples             | Ethanol                                                                  | Tween 20           | PBS |
| Citrate Capped AuNP | $23 \pm 0.38$                                                            | $6 \pm 0.31$       | *   |
| PDADMAC Coated AuNP | $6 \pm 0.94$                                                             | $2 \pm 0.47$       | *   |
|                     | Absorbance (a.u.)                                                        |                    |     |
| Citrate Capped AuNP | $0.149 \pm 0.08$                                                         | $0.08 \pm 0.008$   | *   |
| PDADMAC Coated AuNP | $0.173 \pm 0.001$                                                        | $0.130 \pm 0.0009$ | *   |

\*All samples in PBS irreversibly aggregated and were unable to be removed from the centrifuge tubes with a concentration of AuNP suitable for UV-Vis.
